# Supplementary material for: Cutting-edge green synthesis and characterization of novel Ni(ii) and Co(ii) fluoroimine complexes: a multifaceted evaluation of anticancer, antioxidant, and antimicrobial activities
Source: Royal Society of Chemistry journal article supplement (doi:10.1039/d4nj04189e), 2025-01-01
Supplement: d4nj04189e1.pdf [file d4nj04189e1.pdf]

## SUPPLEMENTARY INFORMATION

### Cutting-Edge Green Synthesis and Characterization of Novel Ni(II) and Co(II) Fluoroimine Complexes: A Multifaceted Evaluation of Anticancer, Antioxidant, and Antimicrobial Activities

Shivansh Bhatnagar<sup>a</sup>, Akshita Jain<sup>a</sup>, Naveen Sharma<sup>a</sup>, Krishna Kumar Jhankal<sup>a</sup> and Nighat Fahmi<sup>\*a</sup>

<sup>a</sup>Department of Chemistry, University of Rajasthan, Jaipur-302004, Rajasthan, India

Corresponding author E-mail: [nighat.fahmi@gmail.com](mailto:nighat.fahmi@gmail.com)

#### analytic functional testing

UNICUBE 2021

serial number: 0400.191001

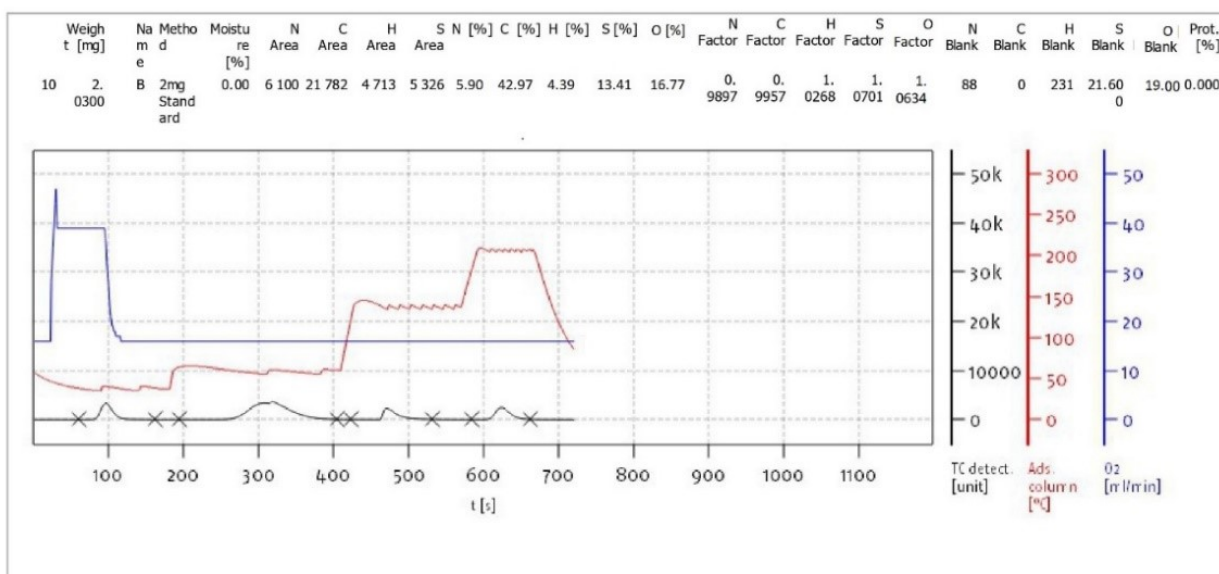

Name:

Access: unicube superuser

Date: Mon Feb 26 04:16:41 2024

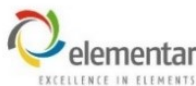

unicube V1.0.1 (b2597c8) 2018-06-29  
Serial No: 0400.191001  
Mode CHNS

Document: int from: 22-02-2024 23:01

Page 1 (from 6)

Fig. S1- Elemental analysis data of  $[\text{Ni}(\text{L}_1)(\text{OAc})(\text{H}_2\text{O})_3]$

analytic functional testing  
 UNICUBE 2021  
 serial number: 0400.191001

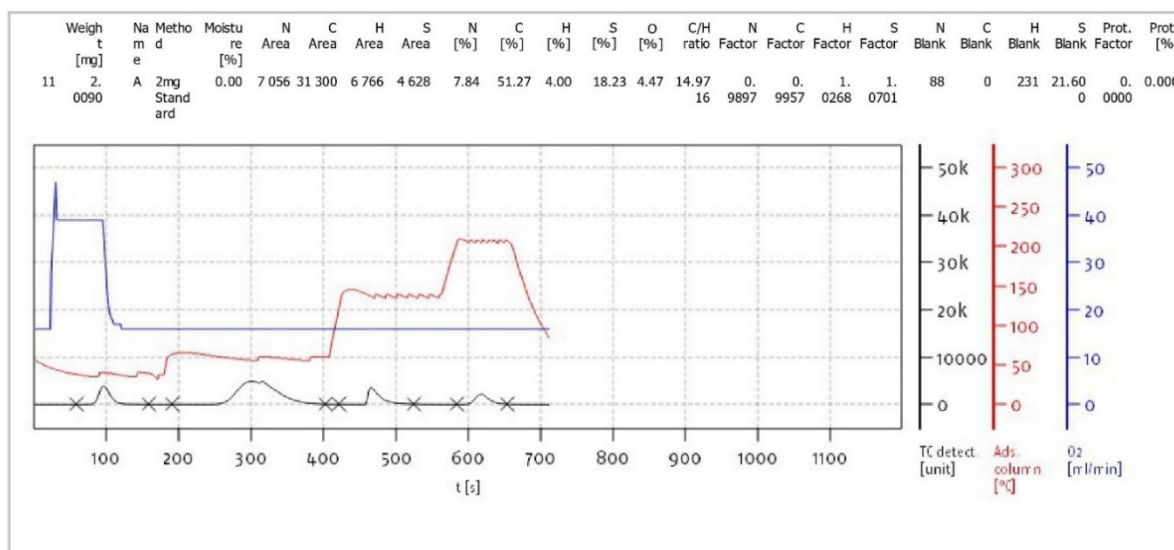

Name:

Access: unicube superuser

Date: Mon Feb 26 04:16:41 2024

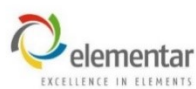

unicube V1.0.1 (b2597c8) 2018-06-29  
 Serial No: 0400.191001  
 Mode CHNS

Document: int from: 22-02-2024 23:01

Page 2 (from 6)

Fig. S2- Elemental analysis data of  $[\text{Ni}(\text{L}_1)_2 (\text{H}_2\text{O})_2]$

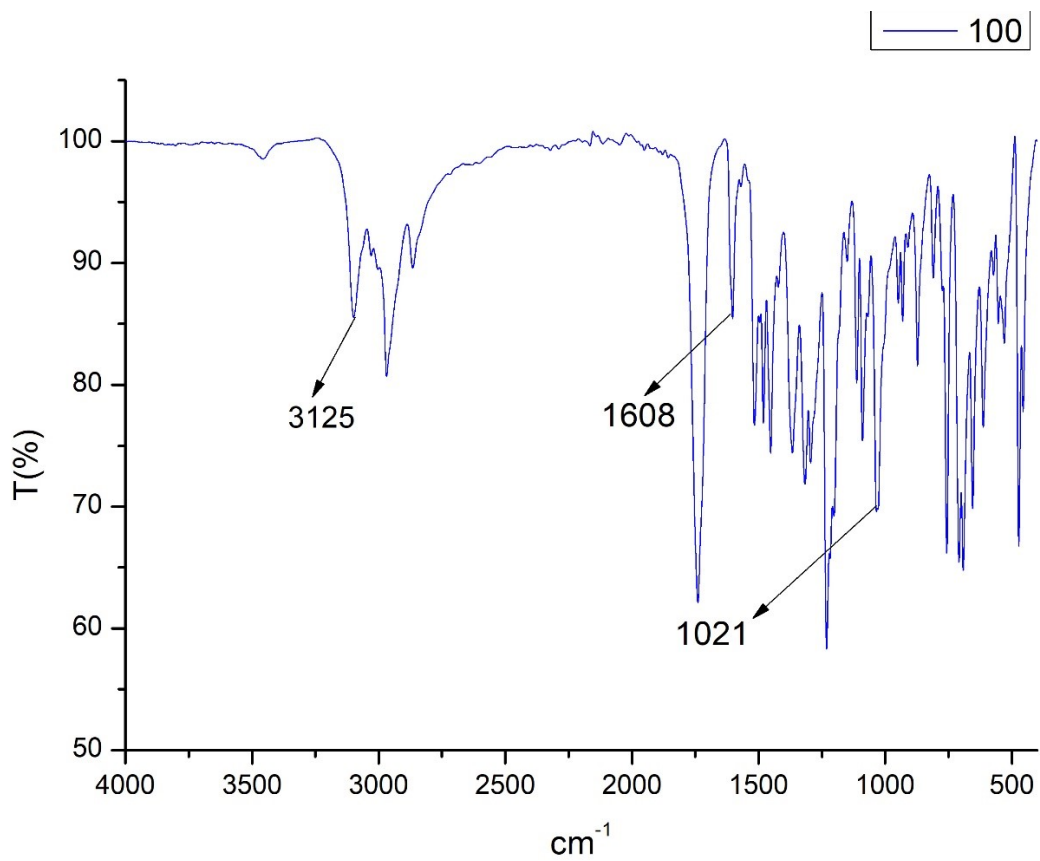

Fig. S3- FT-IR spectrum of ligand L<sub>1</sub>H

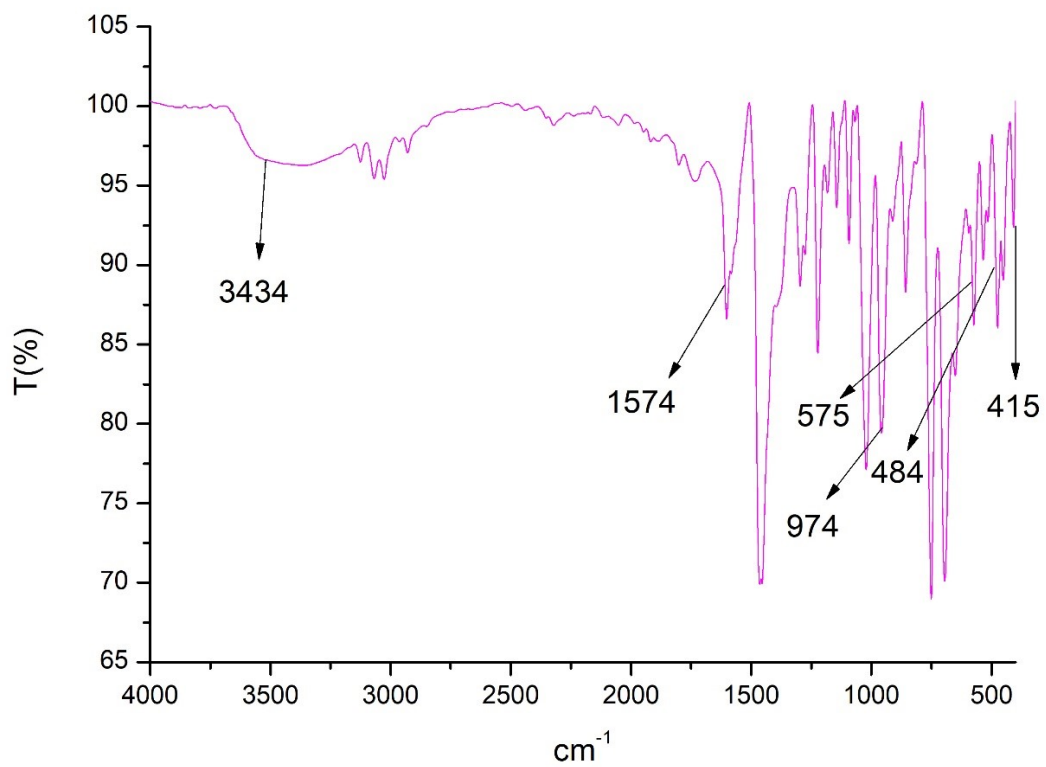

Fig. S4- FT-IR spectrum of complex [Ni(L<sub>1</sub>)(OAc)(H<sub>2</sub>O)<sub>3</sub>]

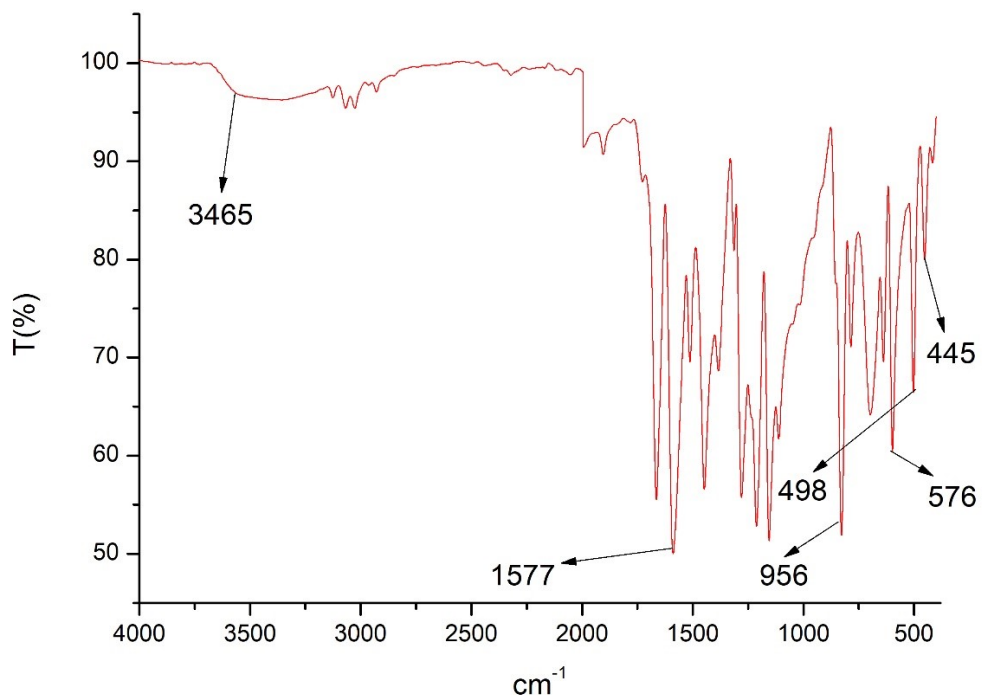

Fig. S5- FT-IR spectrum of complex  $[\text{Ni}(\text{L}_1)_2(\text{H}_2\text{O})_2]$

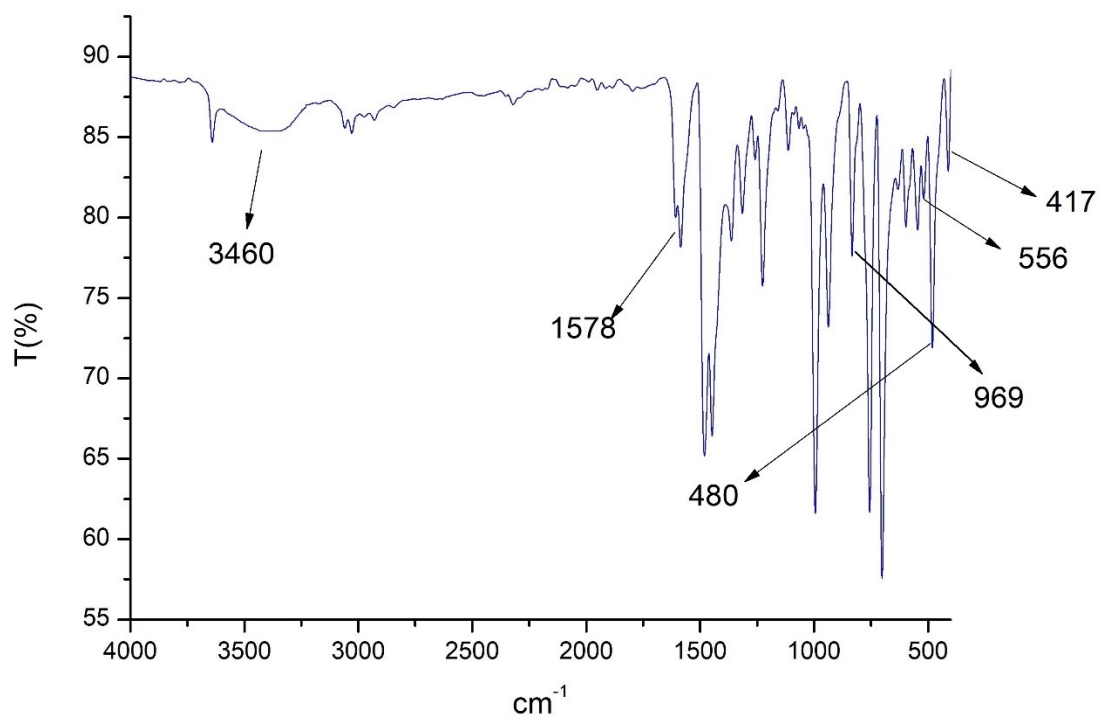

Fig. S6- FT-IR spectrum of complex  $[\text{Co}(\text{L}_1)(\text{OAc})(\text{H}_2\text{O})_3]$

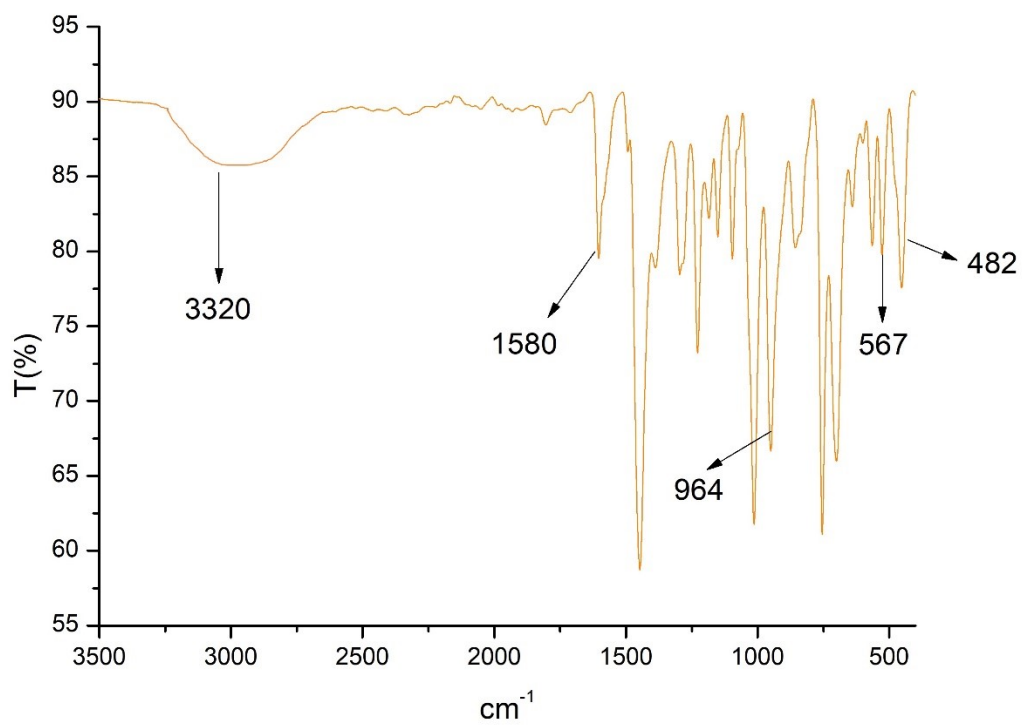

Fig. S7- FT-IR spectrum of complex  $[\text{Co}(\text{L}_1)_2(\text{H}_2\text{O})_2]$

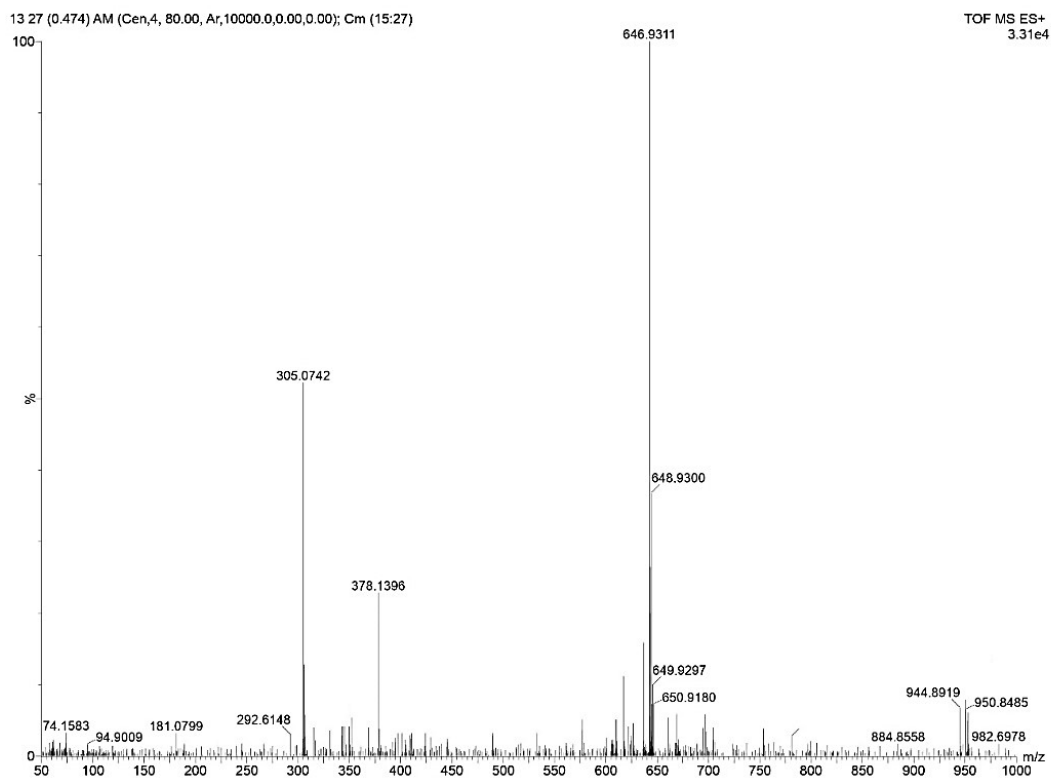

Fig. S8- GSI-MS spectrum of ligand  $\text{L}_1\text{H}$

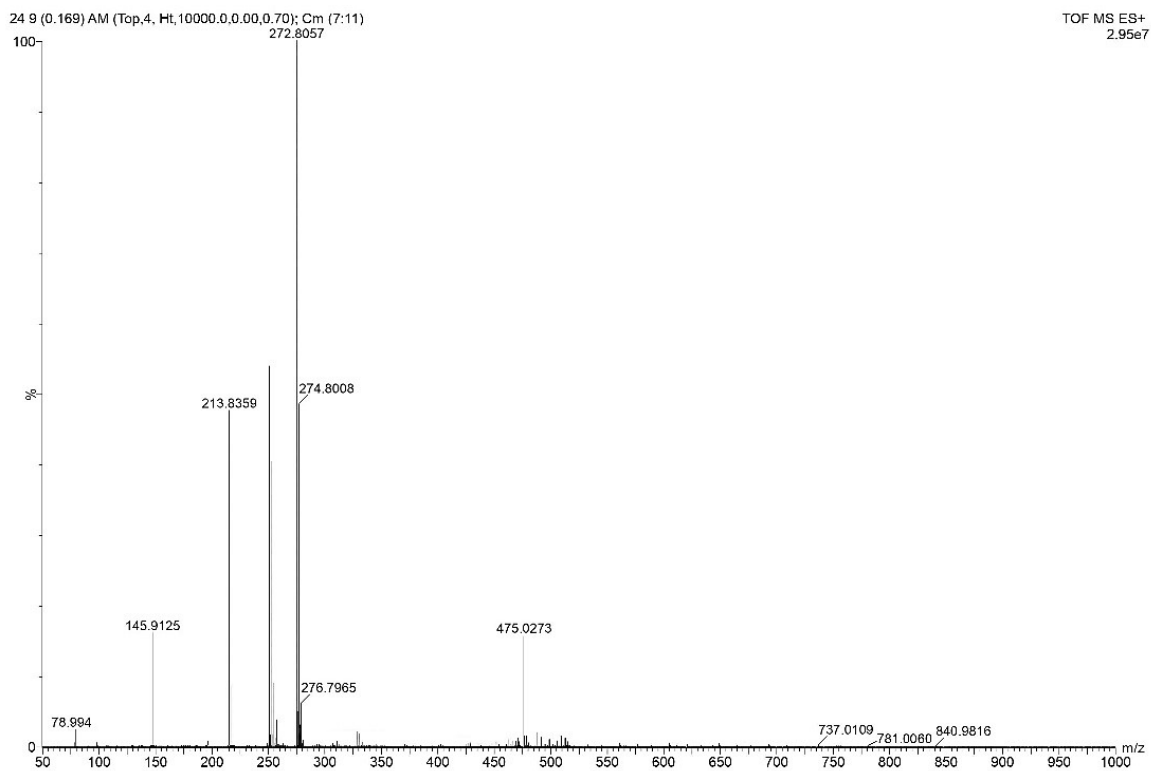

Fig. S9- GSI-MS spectrum of complex  $[\text{Ni}(\text{L}_1)(\text{OAc})(\text{H}_2\text{O})_3]$

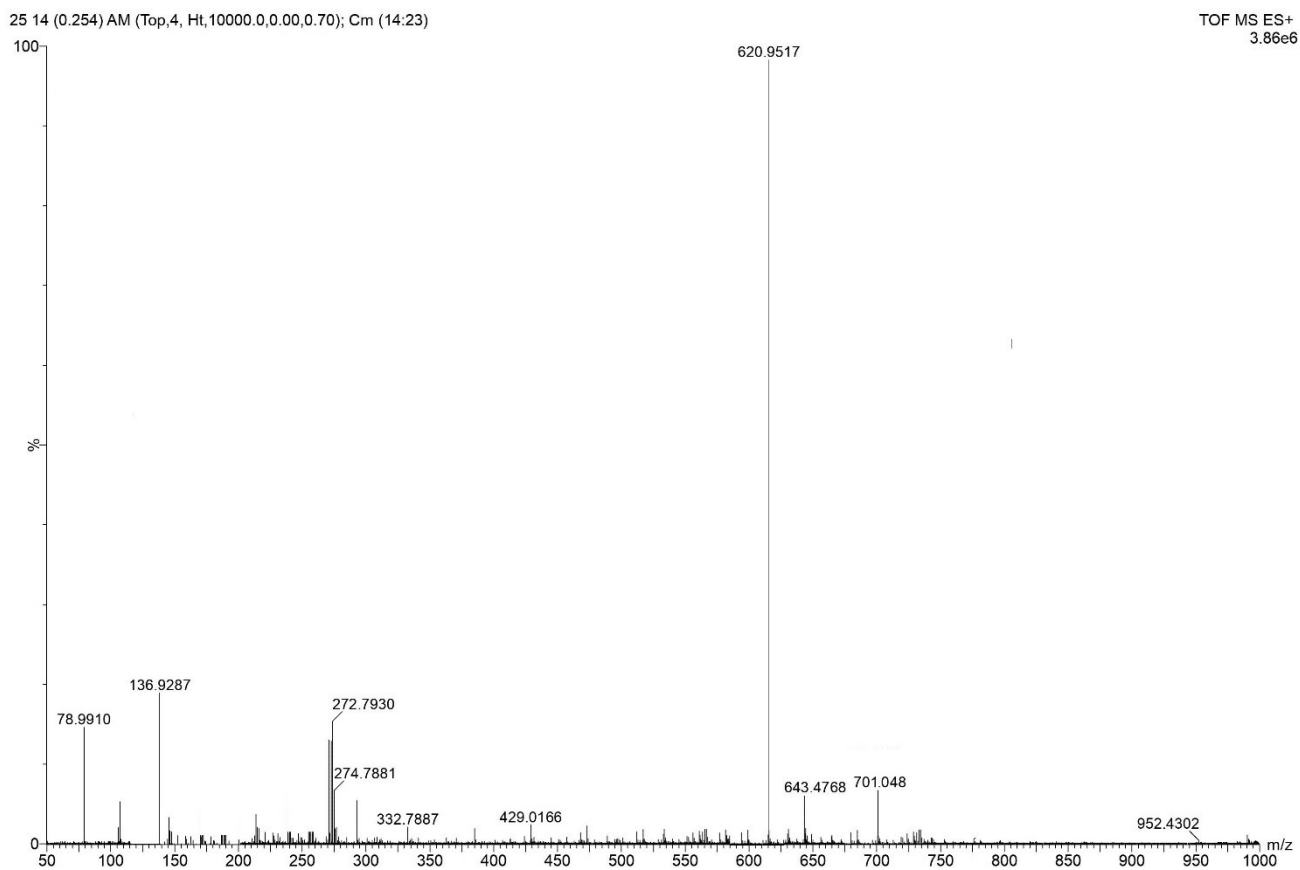

Fig. S10- GSI-MS spectrum of complex  $[\text{Ni}(\text{L}_1)_2(\text{H}_2\text{O})_2]$

26 11 (0.203) AM (Top,4, HI,10000.0,0.00,0.70); Cm (11:15)

TOF MS ES+  
6.79e6

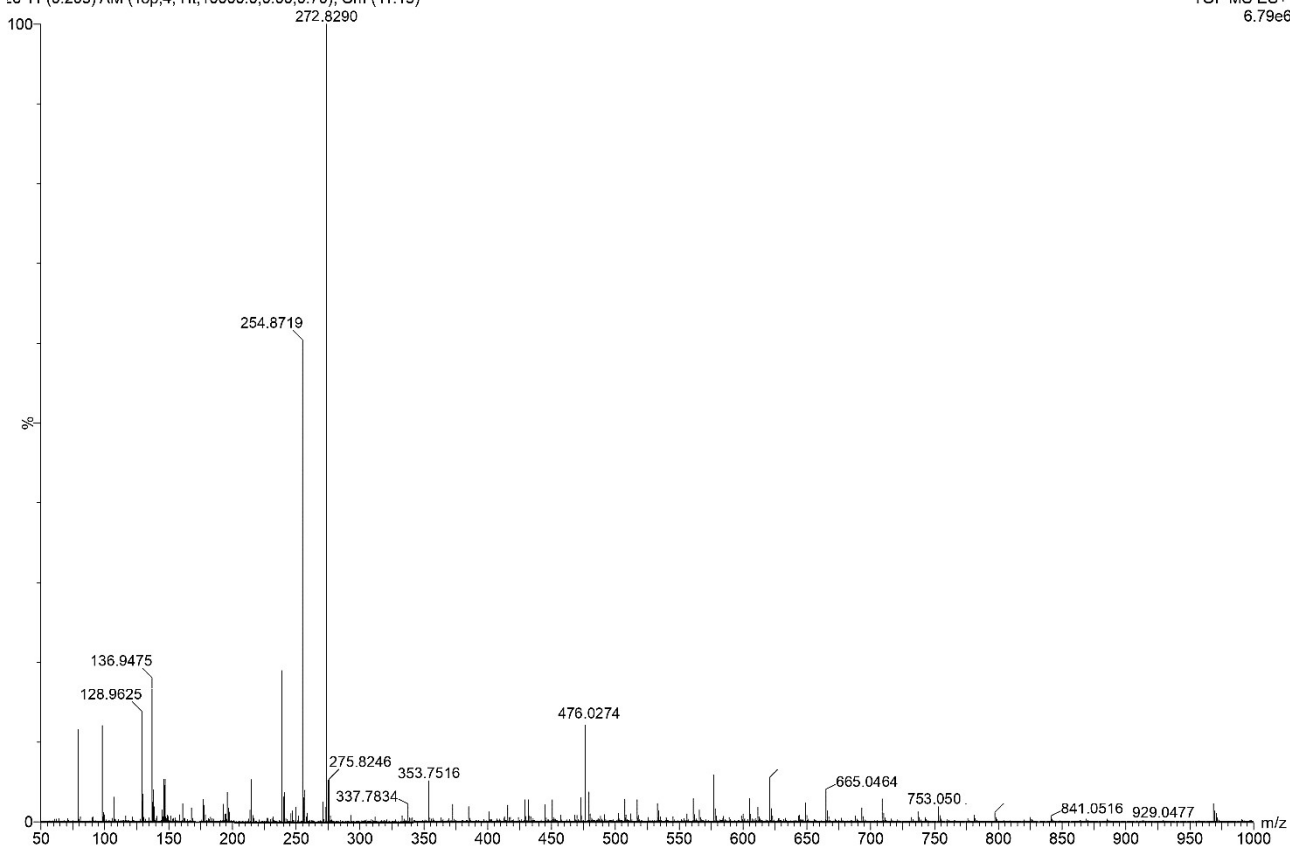

Fig. S11- GSI-MS spectrum of complex  $[\text{Co}(\text{L}_1)(\text{OAc})(\text{H}_2\text{O})_3]$

16 10 (0.186) AM (Cen,4, 80.00, Ar,10000.0,0.00,0.00); Cm (6:17)

TOF MS ES+  
1.99e4

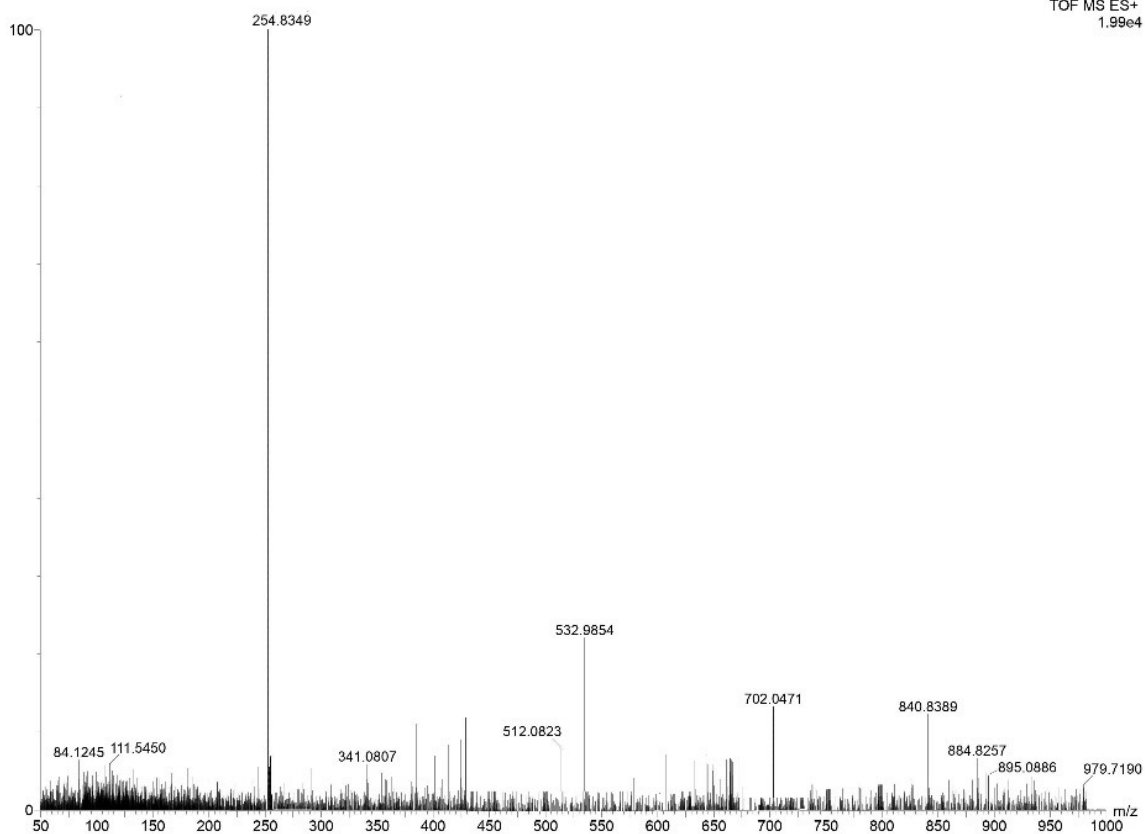

Fig. S12- GSI-MS spectrum of complex  $[\text{Co}(\text{L}_1)_2(\text{H}_2\text{O})_2]$

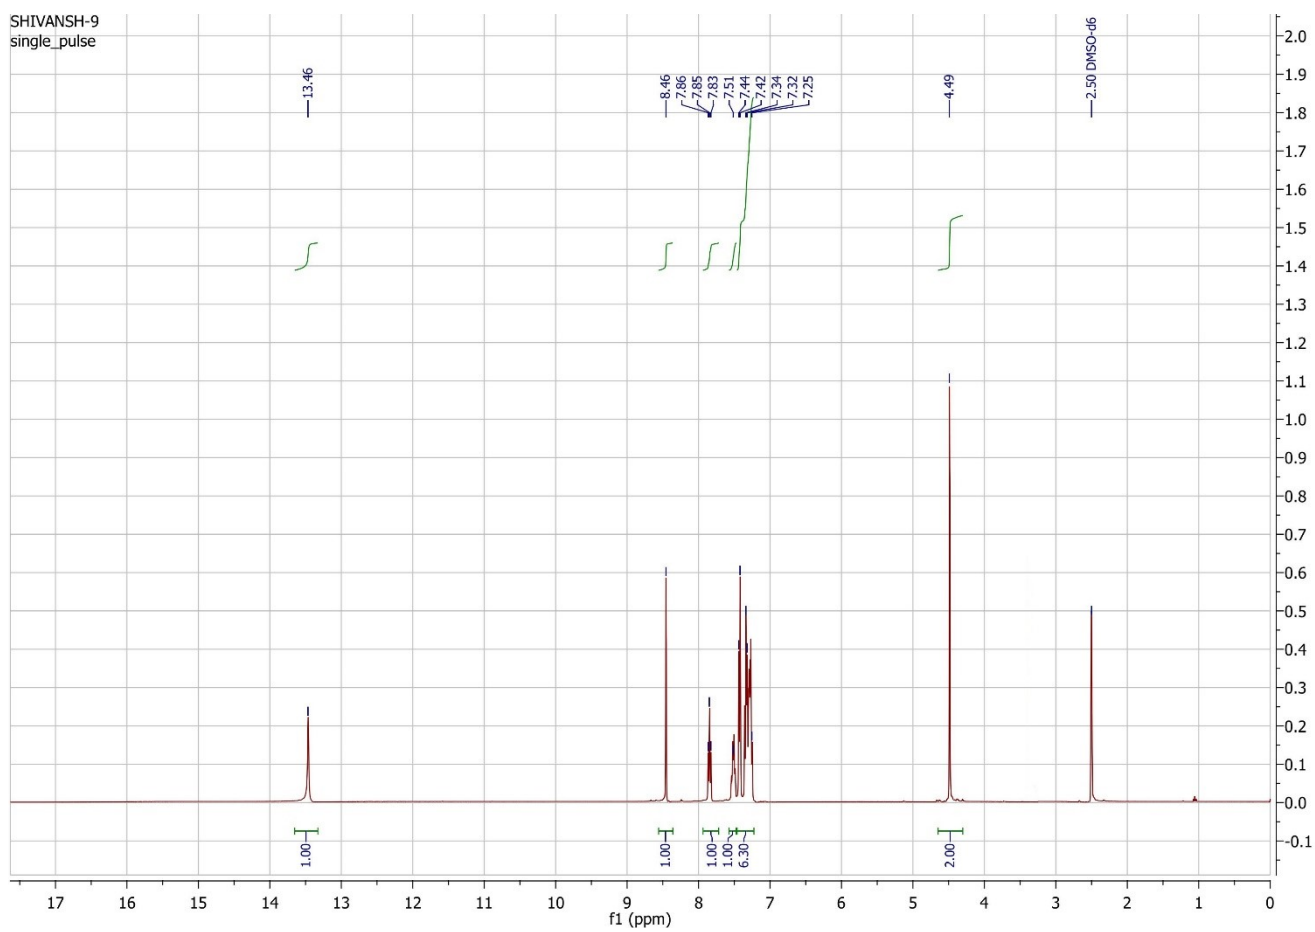

Fig. S13-  $^1\text{H}$ -NMR spectrum of ligand  $\text{L}_1\text{H}$



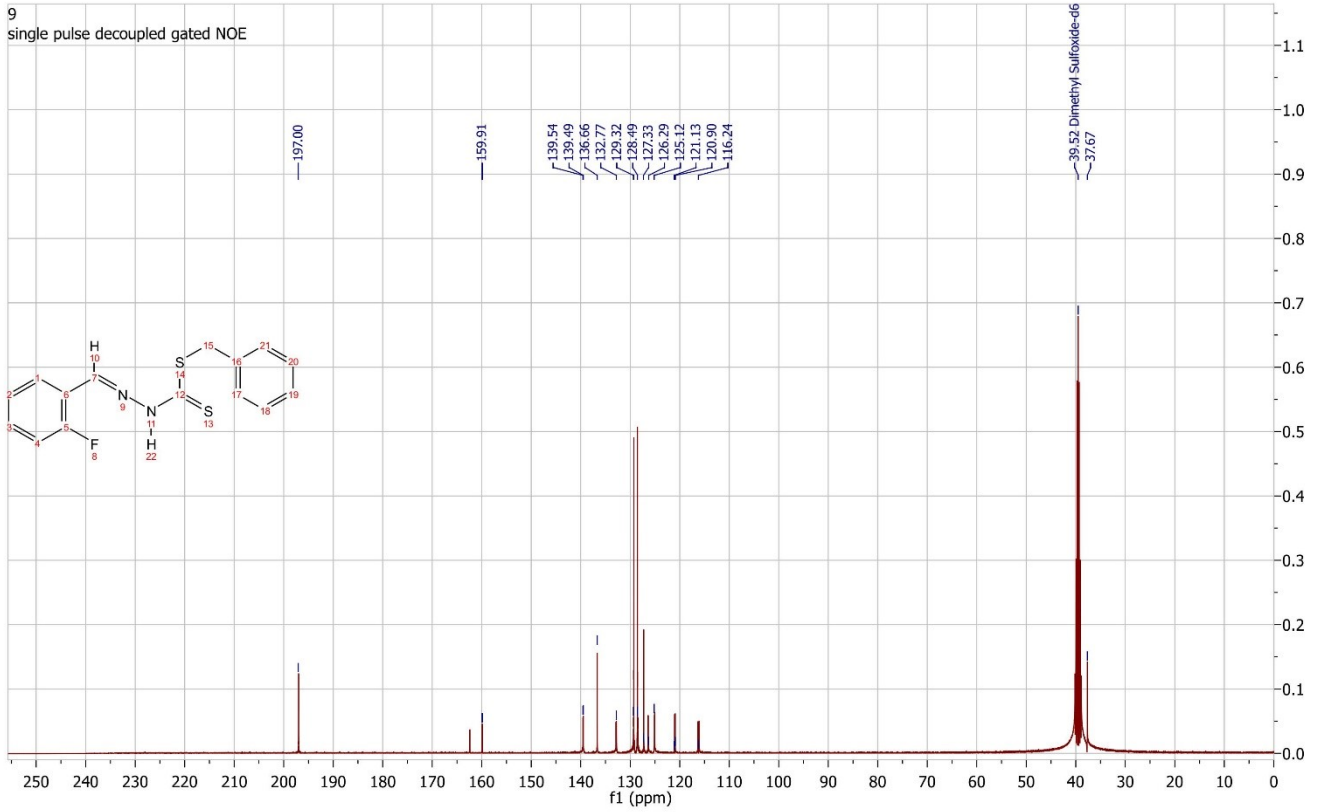

Fig. S14-  $^{13}C$ -NMR spectrum of ligand  $L_1H$

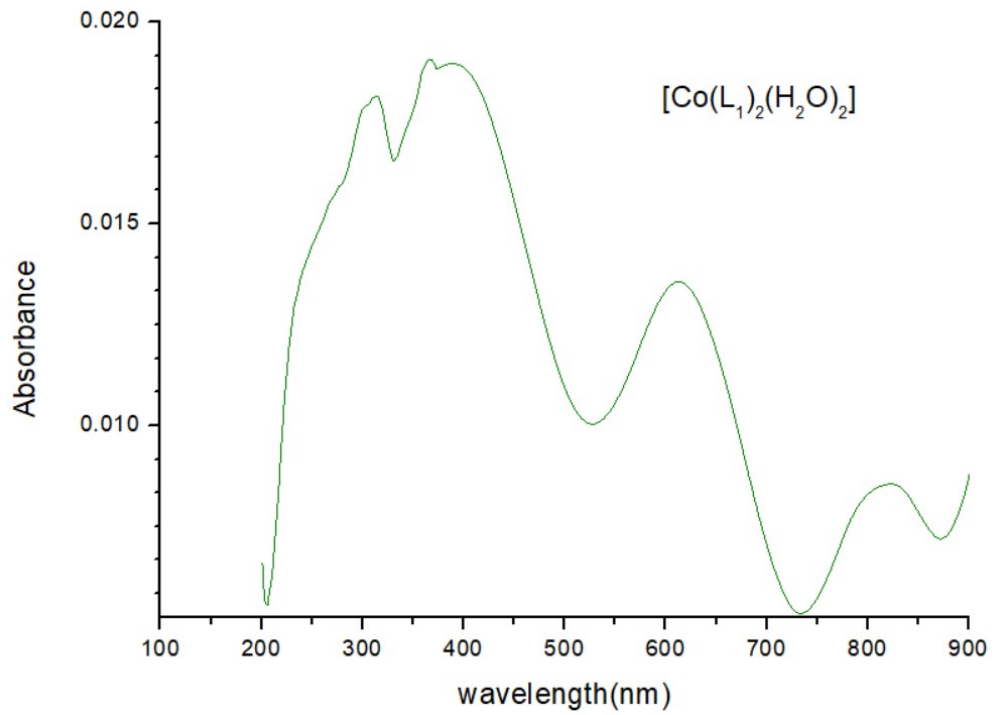

Fig. S15- Electronic absorption spectrum(UV-Visible) of Co(II) complex

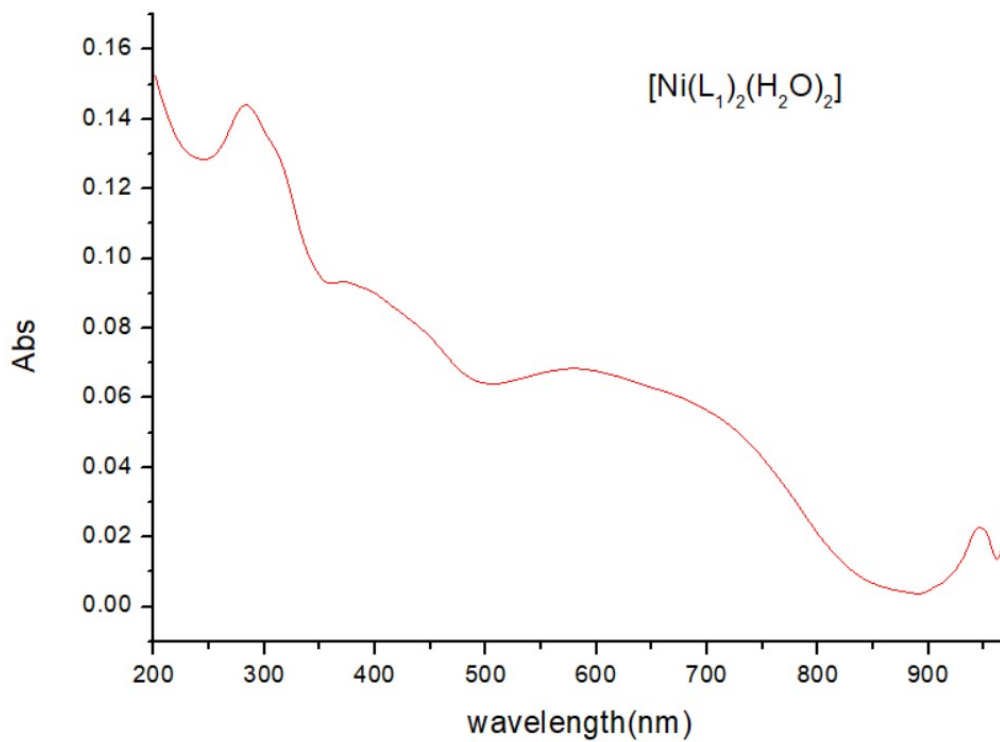

Fig. S16- Electronic absorption spectrum(UV-Visible) of Ni(II) complex

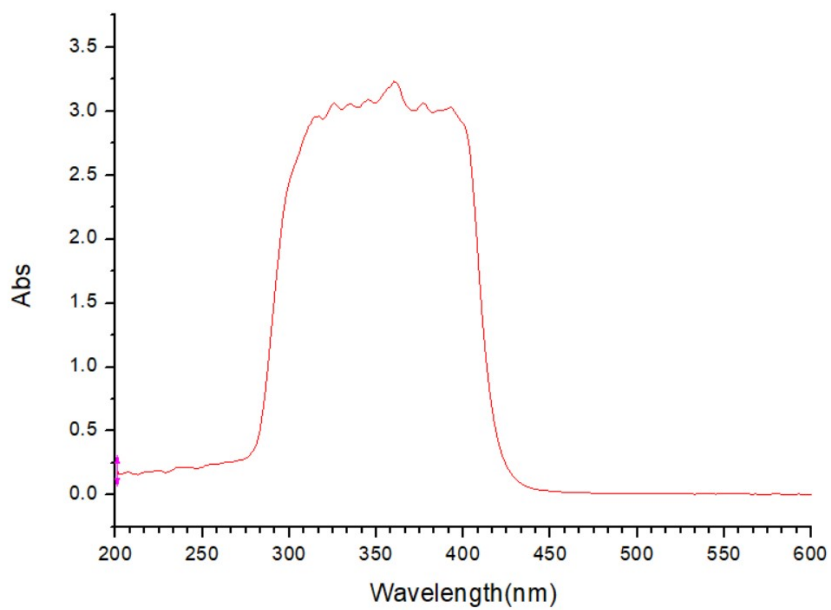

Fig. S17- Electronic absorption spectrum(UV-Visible) of ligand  $\text{L}_1\text{H}$

| Concentration (µg) | Absorbance at 570nm | % Inhibition | % Viability | IC50 (µg) |
|--------------------|---------------------|--------------|-------------|-----------|
| 5                  | 0.492               | 4.65         | 95.35       | 89.24     |
| 10                 | 0.464               | 10.07        | 89.93       |           |
| 25                 | 0.395               | 23.44        | 76.56       |           |
| 50                 | 0.332               | 35.65        | 64.35       |           |
| 100                | 0.247               | 52.13        | 47.87       |           |
| Untreated          | 0.516               | 0            | 100         |           |
| Blank              | 0                   | 0            | 0           |           |

Table-1 Cytotoxicity screening data for complex L<sub>1</sub>H against MCF-7 cell line

| Concentration (µg) | Absorbance at 570nm | % Inhibition | % Viability | IC <sub>50</sub> (µg) |
|--------------------|---------------------|--------------|-------------|-----------------------|
| 5                  | 0.609               | 3.02         | 96.98       | 86.1                  |
| 10                 | 0.584               | 7            | 93          |                       |
| 25                 | 0.523               | 16.71        | 83.29       |                       |
| 50                 | 0.422               | 32.8         | 67.2        |                       |
| 100                | 0.275               | 56.21        | 43.79       |                       |
| Untreated          | 0.628               | 0            | 100         |                       |
| Blank              | 0                   | 0            | 0           |                       |

Table-2 Cytotoxicity screening data for complex L<sub>1</sub>H against HeLa cell line

| Concentration (µg) | Absorbance at 570nm | % Inhibition | % Viability | IC <sub>50</sub> (µg) |
|--------------------|---------------------|--------------|-------------|-----------------------|
| 5                  | 0.965               | 2.12         | 97.88       | 344.73                |
| 10                 | 0.934               | 5.27         | 94.73       |                       |
| 25                 | 0.897               | 9.02         | 90.98       |                       |
| 50                 | 0.868               | 11.96        | 88.04       |                       |
| 100                | 0.827               | 16.12        | 83.88       |                       |
| Untreated          | 0.986               | 0            | 100         |                       |
| Blank              | 0                   | 0            | 0           |                       |

Table-3 Cytotoxicity screening data for complex L<sub>1</sub>H against normal human HEK293 cell line

| Concentration (µg) | Absorbance at 570nm | % Inhibition | % Viability | IC50 (µg) |
|--------------------|---------------------|--------------|-------------|-----------|
| 5                  | 0.496               | 3.87         | 96.13       | 60.48     |
| 10                 | 0.457               | 11.43        | 88.57       |           |
| 25                 | 0.385               | 25.38        | 74.62       |           |
| 50                 | 0.254               | 50.77        | 49.23       |           |
| 100                | 0.129               | 75           | 25          |           |
| Untreated          | 0.516               | 0            | 100         |           |
| Blank              | 0                   | 0            | 0           |           |

Table-4 Cytotoxicity screening data for complex  $[\text{Ni}(\text{L}_1)_2 (\text{H}_2\text{O})_2]$  against MCF-7 cell line

| Concentration (µg) | Absorbance at 570nm | % Inhibition | % Viability | IC50 (µg) |
|--------------------|---------------------|--------------|-------------|-----------|
| 5                  | 0.585               | 6.84         | 93.16       | 55.28     |
| 10                 | 0.546               | 13.05        | 86.95       |           |
| 25                 | 0.419               | 33.28        | 66.72       |           |
| 50                 | 0.273               | 56.52        | 43.48       |           |
| 100                | 0.145               | 76.91        | 23.09       |           |
| Untreated          | 0.628               | 0            | 100         |           |
| Blank              | 0                   | 0            | 0           |           |

Table-5 Cytotoxicity screening data for complex  $[\text{Ni}(\text{L}_1)_2 (\text{H}_2\text{O})_2]$  against HeLa cell line

| Concentration (µg) | Absorbance at 570nm | % Inhibition | % Viability | IC50 (µg) |
|--------------------|---------------------|--------------|-------------|-----------|
| 5                  | 0.971               | 1.52         | 98.48       | 399.22    |
| 10                 | 0.952               | 3.44         | 96.56       |           |
| 25                 | 0.913               | 7.4          | 92.6        |           |
| 50                 | 0.886               | 10.14        | 89.86       |           |
| 100                | 0.853               | 13.48        | 86.52       |           |
| Untreated          | 0.986               | 0            | 100         |           |
| Blank              | 0                   | 0            | 0           |           |

Table-6 Cytotoxicity screening data for complex  $[\text{Ni}(\text{L}_1)_2 (\text{H}_2\text{O})_2]$  against normal human HEK293 cell line

| Concentration (µg) | Absorbance at 570nm | % Inhibition | % Viability | IC50 (µg) |
|--------------------|---------------------|--------------|-------------|-----------|
| 5                  | 0.965               | 2.12         | 97.88       | 344.73    |
| 10                 | 0.934               | 5.27         | 94.73       |           |
| 25                 | 0.897               | 9.02         | 90.98       |           |
| 50                 | 0.868               | 11.96        | 88.04       |           |
| 100                | 0.827               | 16.12        | 83.88       |           |
| Untreated          | 0.986               | 0            | 100         |           |
| Blank              | 0                   | 0            | 0           |           |

Table-7 Cytotoxicity screening data for complex  $[\text{Co}(\text{L}_1)_2 (\text{H}_2\text{O})_2]$  against MCF-7 cell line

| Concentration (µg) | Absorbance at 570nm | % Inhibition | % Viability | IC50 (µg) |
|--------------------|---------------------|--------------|-------------|-----------|
| 5                  | 0.503               | 2.51         | 97.49       | 88.99     |
| 10                 | 0.486               | 5.81         | 94.19       |           |
| 25                 | 0.449               | 12.98        | 87.02       |           |
| 50                 | 0.341               | 33.91        | 66.09       |           |
| 100                | 0.238               | 53.87        | 46.13       |           |
| Untreated          | 0.516               | 0            | 100         |           |
| Blank              | 0                   | 0            | 0           |           |

Table-8 Cytotoxicity screening data for complex  $[\text{Co}(\text{L}_1)_2 (\text{H}_2\text{O})_2]$  against HeLa cell line

| Concentration (µg) | Absorbance at 570nm | % Inhibition | % Viability | IC50 (µg) |
|--------------------|---------------------|--------------|-------------|-----------|
| 5                  | 0.593               | 5.57         | 94.43       | 59.67     |
| 10                 | 0.566               | 9.87         | 90.13       |           |
| 25                 | 0.437               | 30.44        | 69.56       |           |
| 50                 | 0.294               | 53.18        | 46.82       |           |
| 100                | 0.168               | 73.24        | 26.76       |           |
| Untreated          | 0.628               | 0            | 100         |           |
| Blank              | 0                   | 0            | 0           |           |

Table-9 Cytotoxicity screening data for complex  $[\text{Co}(\text{L}_1)_2 (\text{H}_2\text{O})_2]$  against normal human HEK293 cell line

| Concentration(ppm) | L <sub>1</sub> H | [Ni(L <sub>1</sub> )(OAc)(H <sub>2</sub> O) <sub>3</sub> ] | [Ni(L <sub>1</sub> ) <sub>2</sub> (H <sub>2</sub> O) <sub>2</sub> ] | [Co(L <sub>1</sub> )(OAc)(H <sub>2</sub> O) <sub>3</sub> ] | [Co(L <sub>1</sub> ) <sub>2</sub> (H <sub>2</sub> O) <sub>2</sub> ] |
|--------------------|------------------|------------------------------------------------------------|---------------------------------------------------------------------|------------------------------------------------------------|---------------------------------------------------------------------|
| 20                 | 12.64            | 36.45                                                      | 23.78                                                               | 32.67                                                      | 17.11                                                               |
| 40                 | 16.78            | 44.67                                                      | 30.87                                                               | 37.6                                                       | 23.01                                                               |
| 60                 | 22.67            | 49.54                                                      | 36.09                                                               | 43.58                                                      | 29.86                                                               |
| 80                 | 28.45            | 54.34                                                      | 40.05                                                               | 48.44                                                      | 34.78                                                               |
| 100                | 32.56            | 56.23                                                      | 43.31                                                               | 51.22                                                      | 37.63                                                               |

Table-10 Mean % Radical Scavenging activity of compounds against DPPH free radical

| Concentration(ppm) | L <sub>1</sub> H | [Ni(L <sub>1</sub> )(OAc)(H <sub>2</sub> O) <sub>3</sub> ] | [Ni(L <sub>1</sub> ) <sub>2</sub> (H <sub>2</sub> O) <sub>2</sub> ] | [Co(L <sub>1</sub> )(OAc)(H <sub>2</sub> O) <sub>3</sub> ] | [Co(L <sub>1</sub> ) <sub>2</sub> (H <sub>2</sub> O) <sub>2</sub> ] |
|--------------------|------------------|------------------------------------------------------------|---------------------------------------------------------------------|------------------------------------------------------------|---------------------------------------------------------------------|
| 20                 | 14.26            | 41.32                                                      | 25.45                                                               | 34.54                                                      | 19.67                                                               |
| 40                 | 19.34            | 46.45                                                      | 32.54                                                               | 39.47                                                      | 25.57                                                               |
| 60                 | 25.68            | 52.54                                                      | 37.76                                                               | 45.45                                                      | 31.64                                                               |
| 80                 | 31.38            | 57.45                                                      | 42.39                                                               | 51.56                                                      | 36.56                                                               |
| 100                | 36.56            | 61.67                                                      | 45.65                                                               | 54.34                                                      | 39.41                                                               |

Table-11 Mean % Radical Scavenging activity of compounds against ABTS free radical

| Compounds                                                           | <i>Penicillium</i><br>(50ppm) | <i>Penicillium</i><br>(100ppm) | <i>Penicillium</i><br>(150ppm) | <i>Penicillium</i><br>(200ppm) | <i>A.niger</i><br>(50ppm) | <i>A.niger</i><br>(100ppm) | <i>A.niger</i><br>(150ppm) | <i>A.niger</i><br>(200ppm) |
|---------------------------------------------------------------------|-------------------------------|--------------------------------|--------------------------------|--------------------------------|---------------------------|----------------------------|----------------------------|----------------------------|
| L <sub>1</sub> H                                                    | 6                             | 9                              | 11                             | 12                             | 6                         | 8                          | 10                         | 12                         |
| [Ni(L <sub>1</sub> )(OAc)(H <sub>2</sub> O) <sub>3</sub> ]          | 10                            | 14                             | 16                             | 19                             | 10                        | 12                         | 16                         | 18                         |
| [Ni(L <sub>1</sub> ) <sub>2</sub> (H <sub>2</sub> O) <sub>2</sub> ] | 8                             | 11                             | 12                             | 14                             | 6.5                       | 9                          | 11                         | 14                         |
| [Co(L <sub>1</sub> )(OAc)(H <sub>2</sub> O) <sub>3</sub> ]          | 8                             | 10                             | 13                             | 13.5                           | 7                         | 8                          | 9                          | 13                         |
| [Co(L <sub>1</sub> ) <sub>2</sub> (H <sub>2</sub> O) <sub>2</sub> ] | 11                            | 12                             | 14                             | 15                             | 8                         | 10                         | 13                         | 15                         |

|              |    |    |    |    |    |    |    |    |
|--------------|----|----|----|----|----|----|----|----|
| Ketoconazole | 24 | 26 | 28 | 30 | 22 | 24 | 26 | 27 |
|--------------|----|----|----|----|----|----|----|----|

Table 12- Antifungal screening data of compounds in terms of mean radii of inhibition zone(mm)

| Compounds                                                           | <i>E.coli</i><br>(50ppm) | <i>E.coli</i><br>(100ppm) | <i>E.coli</i><br>(150ppm) | <i>E.coli</i><br>(200ppm) | <i>S.aureus</i><br>(50ppm) | <i>S.aureus</i><br>(100ppm) | <i>S.aureus</i><br>(150ppm) | <i>S.aureus</i><br>(200ppm) |
|---------------------------------------------------------------------|--------------------------|---------------------------|---------------------------|---------------------------|----------------------------|-----------------------------|-----------------------------|-----------------------------|
| L <sub>1</sub> H                                                    | 8                        | 10                        | 12                        | 13                        | 6                          | 9                           | 11                          | 13                          |
| [Ni(L <sub>1</sub> )(OAc)(H <sub>2</sub> O) <sub>3</sub> ]          | 14                       | 17                        | 18                        | 20                        | 16                         | 18                          | 19                          | 21                          |
| [Ni(L <sub>1</sub> ) <sub>2</sub> (H <sub>2</sub> O) <sub>2</sub> ] | 9.5                      | 10                        | 12                        | 13                        | 11                         | 12                          | 13                          | 15                          |
| [Co(L <sub>1</sub> )(OAc)(H <sub>2</sub> O) <sub>3</sub> ]          | 9                        | 10.5                      | 13                        | 15                        | 8                          | 11                          | 12                          | 14                          |
| [Co(L <sub>1</sub> ) <sub>2</sub> (H <sub>2</sub> O) <sub>2</sub> ] | 11                       | 12                        | 14                        | 18                        | 9                          | 15                          | 16                          | 18                          |
| Ciprofloxacin(stand.)                                               | 24                       | 27                        | 29                        | 31                        | 26                         | 28                          | 30                          | 32                          |

Table 13- Antibacterial screening data of compounds in terms of mean radii of inhibition zone(mm)

| h | K | L | 2θ (Exp.)<br>(Degree) | 2θ (Calc.)<br>(Degree) | 2θ (Diff.)<br>(Degree) | d (Exp.)<br>(Å) | d (Calc.)<br>(Å) | Intensity<br>(Exp.) |
|---|---|---|-----------------------|------------------------|------------------------|-----------------|------------------|---------------------|
| 0 | 2 | 2 | 22.8565               | 22.6547                | 0.2018                 | 3.886128        | 4.06150          | 1950                |
| 1 | 1 | 1 | 24.4751               | 24.4231                | 0.052                  | 3.63267         | 3.67723          | 1802                |
| 1 | 2 | 0 | 28.8009               | 28.9876                | -0.1867                | 3.096131        | 3.11234          | 1344                |
| 1 | 1 | 2 | 29.5314               | 29.5761                | -0.0447                | 3.021184        | 3.15432          | 1292                |
| 2 | 1 | 0 | 30.7633               | 30.8765                | -0.1132                | 2.902951        | 2.91611          | 1434                |
| 1 | 3 | 0 | 32.7543               | 32.4567                | 0.2976                 | 2.730895        | 2.70767          | 1640                |
| 2 | 2 | 1 | 39.1571               | 39.3256                | -0.1685                | 2.297829        | 2.26341          | 1222                |
| 3 | 1 | 2 | 45.0702               | 45.1234                | -0.0532                | 1.982378        | 1.98421          | 1345                |
| 2 | 3 | 2 | 56.1998               | 56.3067                | -0.1069                | 1.63240         | 1.64047          | 1113                |
| 4 | 0 | 0 | 56.9889               | 56.7689                | 0.2200                 | 1.61579         | 1.62460          | 1324                |

Table 14- h,k,l value and other lattice parameters for complex [Co(L<sub>1</sub>)<sub>2</sub> (H<sub>2</sub>O)<sub>2</sub>]

| <b>h</b> | <b>K</b> | <b>L</b> | <b>2θ (Exp.)<br/>(Degree)</b> | <b>2θ (Calc.)<br/>(Degree)</b> | <b>2θ (Diff.)<br/>(Degree)</b> | <b>d (Exp.)<br/>(Å)</b> | <b>d (Calc.)<br/>(Å)</b> | <b>Intensity<br/>(Exp.)</b> |
|----------|----------|----------|-------------------------------|--------------------------------|--------------------------------|-------------------------|--------------------------|-----------------------------|
| 1        | 0        | 0        | 13.0016                       | 13.3456                        | 0.344                          | 6.801094                | 6.68251                  | 1178                        |
| 1        | 0        | 1        | 14.9210                       | 14.7654                        | -0.1556                        | 5.930255                | 5.910255                 | 2011                        |
| 1        | 1        | 0        | 17.6855                       | 17.8965                        | 0.211                          | 5.009005                | 5.109002                 | 1350                        |
| 1        | 1        | 1        | 19.6766                       | 19.4356                        | -0.241                         | 4.506398                | 4.406396                 | 941                         |
| 2        | 0        | 0        | 20.3498                       | 20.4567                        | 0.1069                         | 4.358814                | 4.258812                 | 1242                        |
| 2        | 1        | 0        | 22.1689                       | 22.2345                        | 0.0656                         | 4.005084                | 4.002085                 | 1544                        |
| 2        | 1        | 1        | 24.0284                       | 24.2345                        | 0.2061                         | 3.699182                | 3.38324                  | 1222                        |
| 2        | 2        | 0        | 26.4948                       | 26.7345                        | 0.2397                         | 3.360153                | 3.260156                 | 1278                        |
| 2        | 2        | 1        | 28.8296                       | 28.6978                        | -0.1318                        | 3.093114                | 3.043116                 | 1113                        |
| 2        | 2        | 2        | 29.6894                       | 28.8976                        | -0.7918                        | 3.005465                | 3.005503                 | 1324                        |
| 3        | 0        | 0        | 30.8976                       | 30.5783                        | 0.1193                         | 2.890638                | 2.712215                 | 1950                        |
| 3        | 1        | 0        | 35.0605                       | 35.2315                        | 0.1710                         | 2.556362                | 2.456363                 | 450                         |
| 3        | 2        | 0        | 41.1481                       | 41.4567                        | 0.3086                         | 2.191125                | 2.091126                 | 490                         |

Table 15- h,k,l value and other lattice parameters for complex  $[\text{Ni}(\text{L}_1)_2(\text{H}_2\text{O})_2]$
